# Supplementary material
Source: PubMed Central journal article supplement (PMC4564298)
Supplement: NIHMS708868-supplement-Supplement.pdf [file NIHMS708868-supplement-Supplement.pdf]

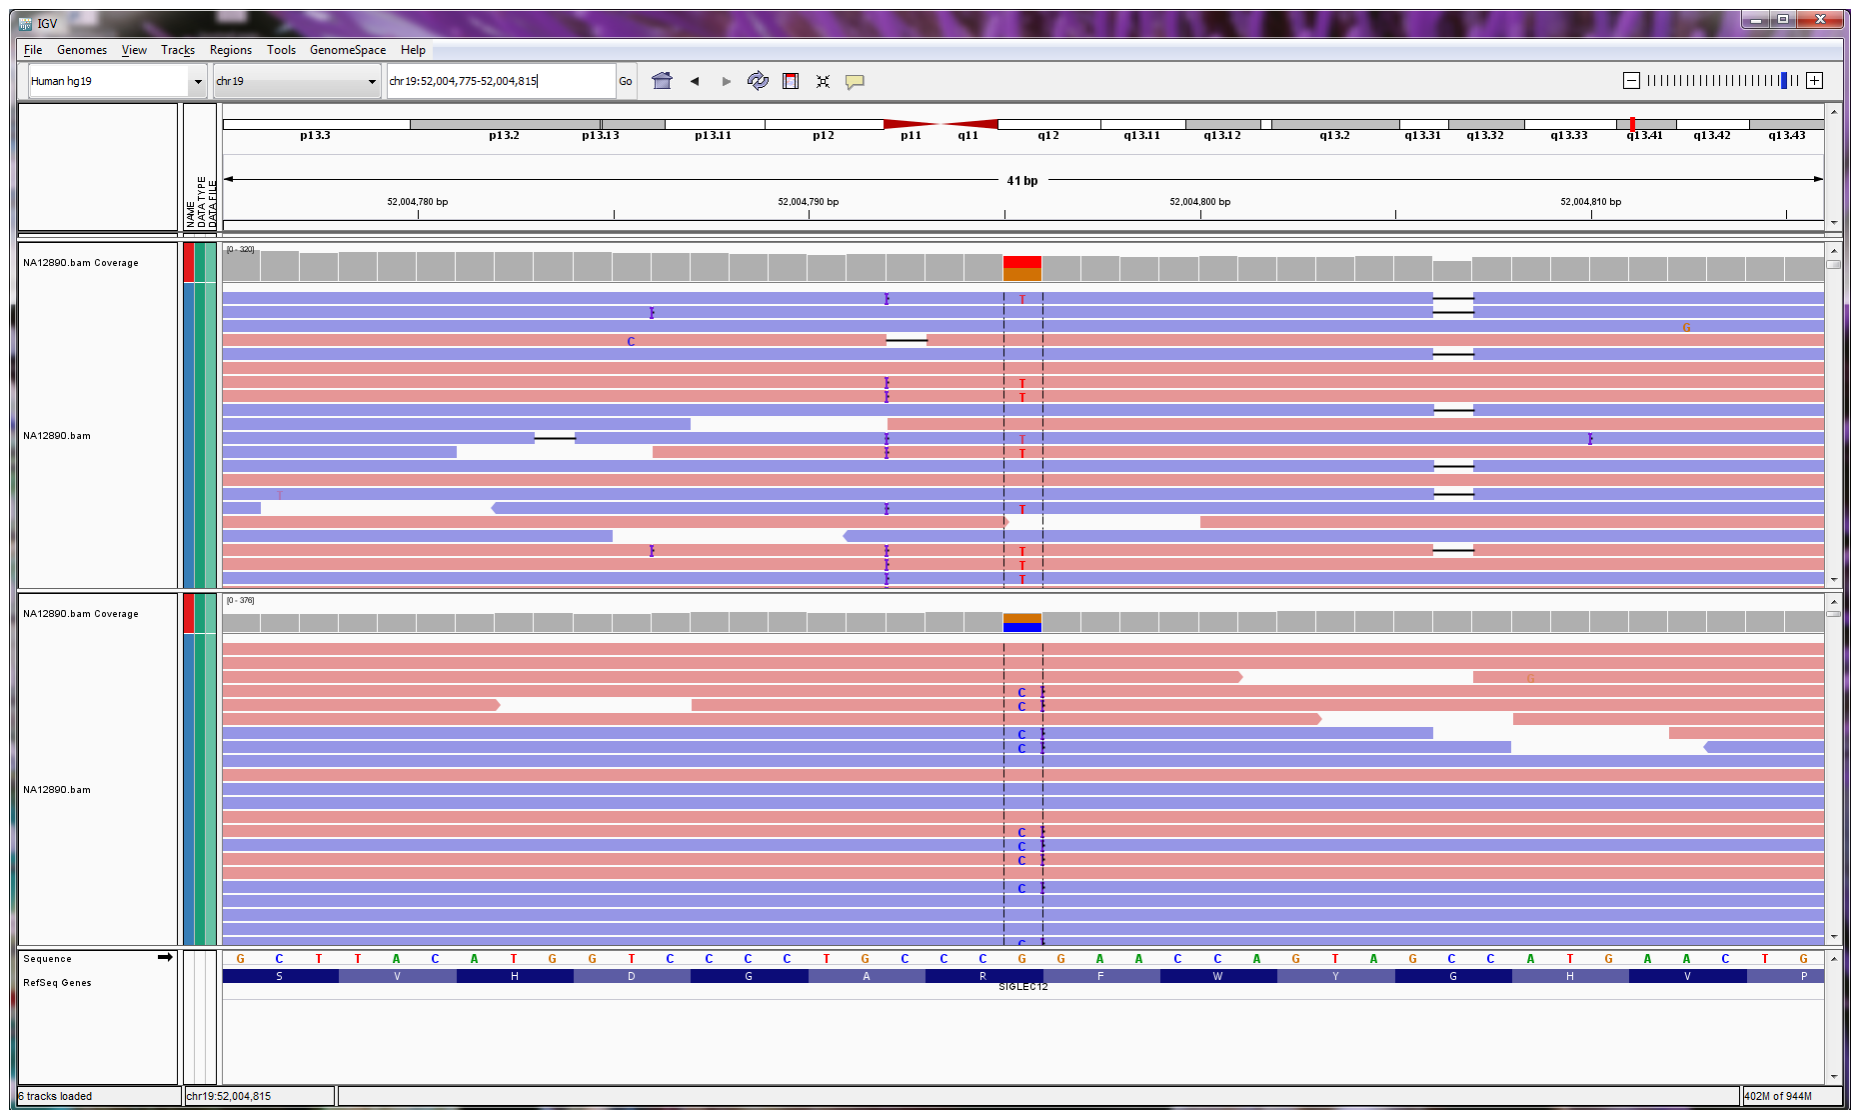

HET/HET discordance – Proton insertion C; Illumina insertion T

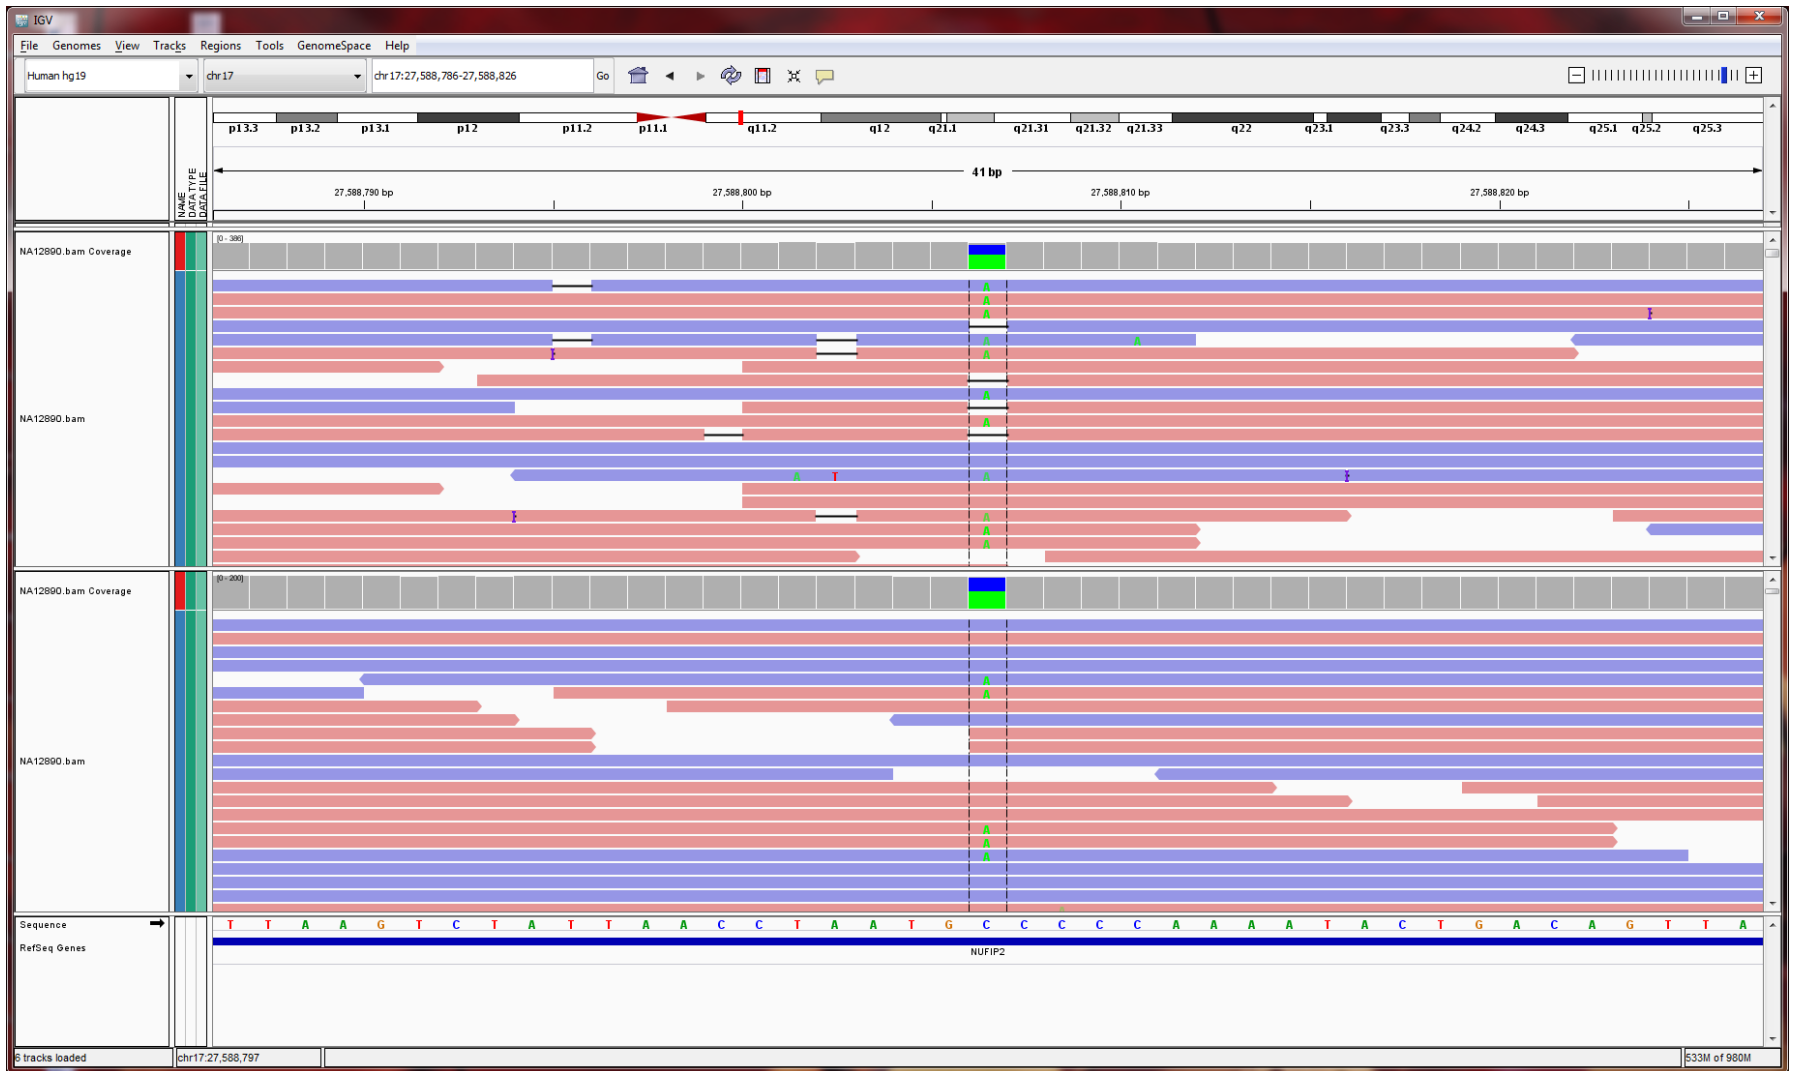

HET/HOM discordance chip vs. Proton. Proton has trouble with the non-reference base.

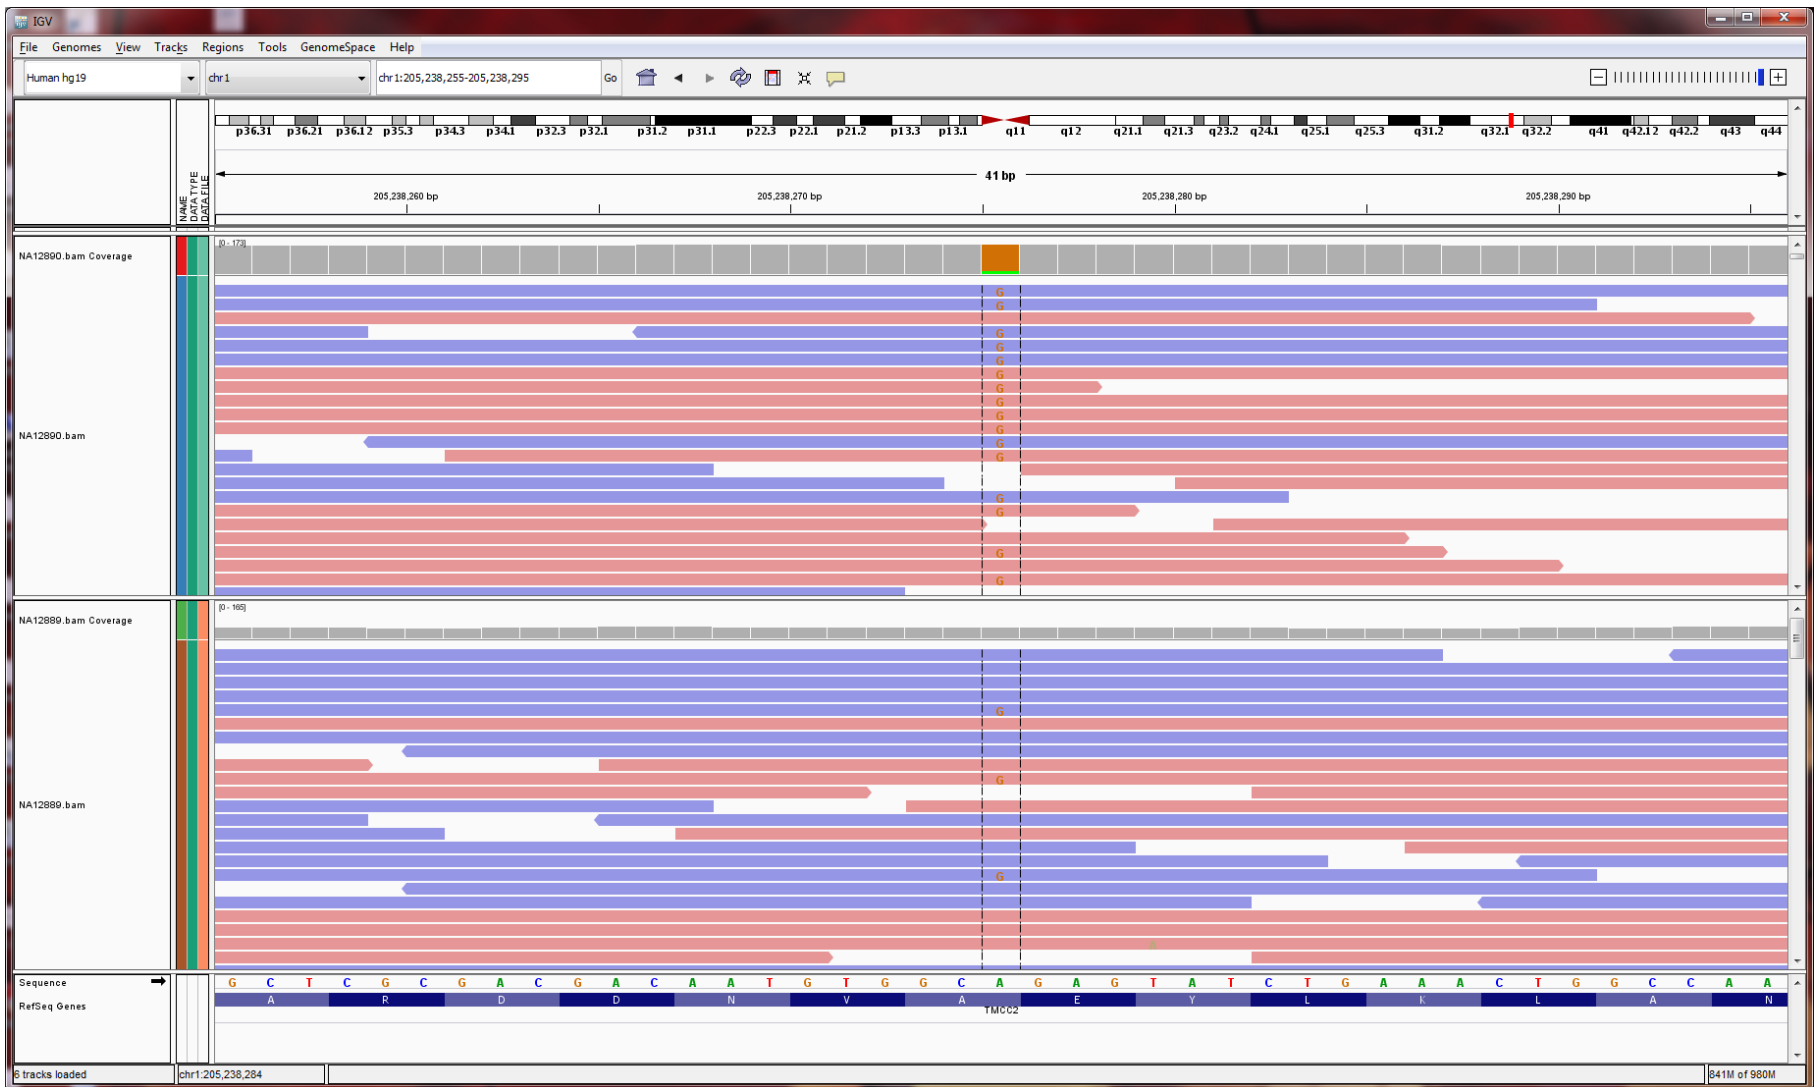

Illumina HOM/HET discordance with chip data in both parents – top 90/10; bottom 83/17

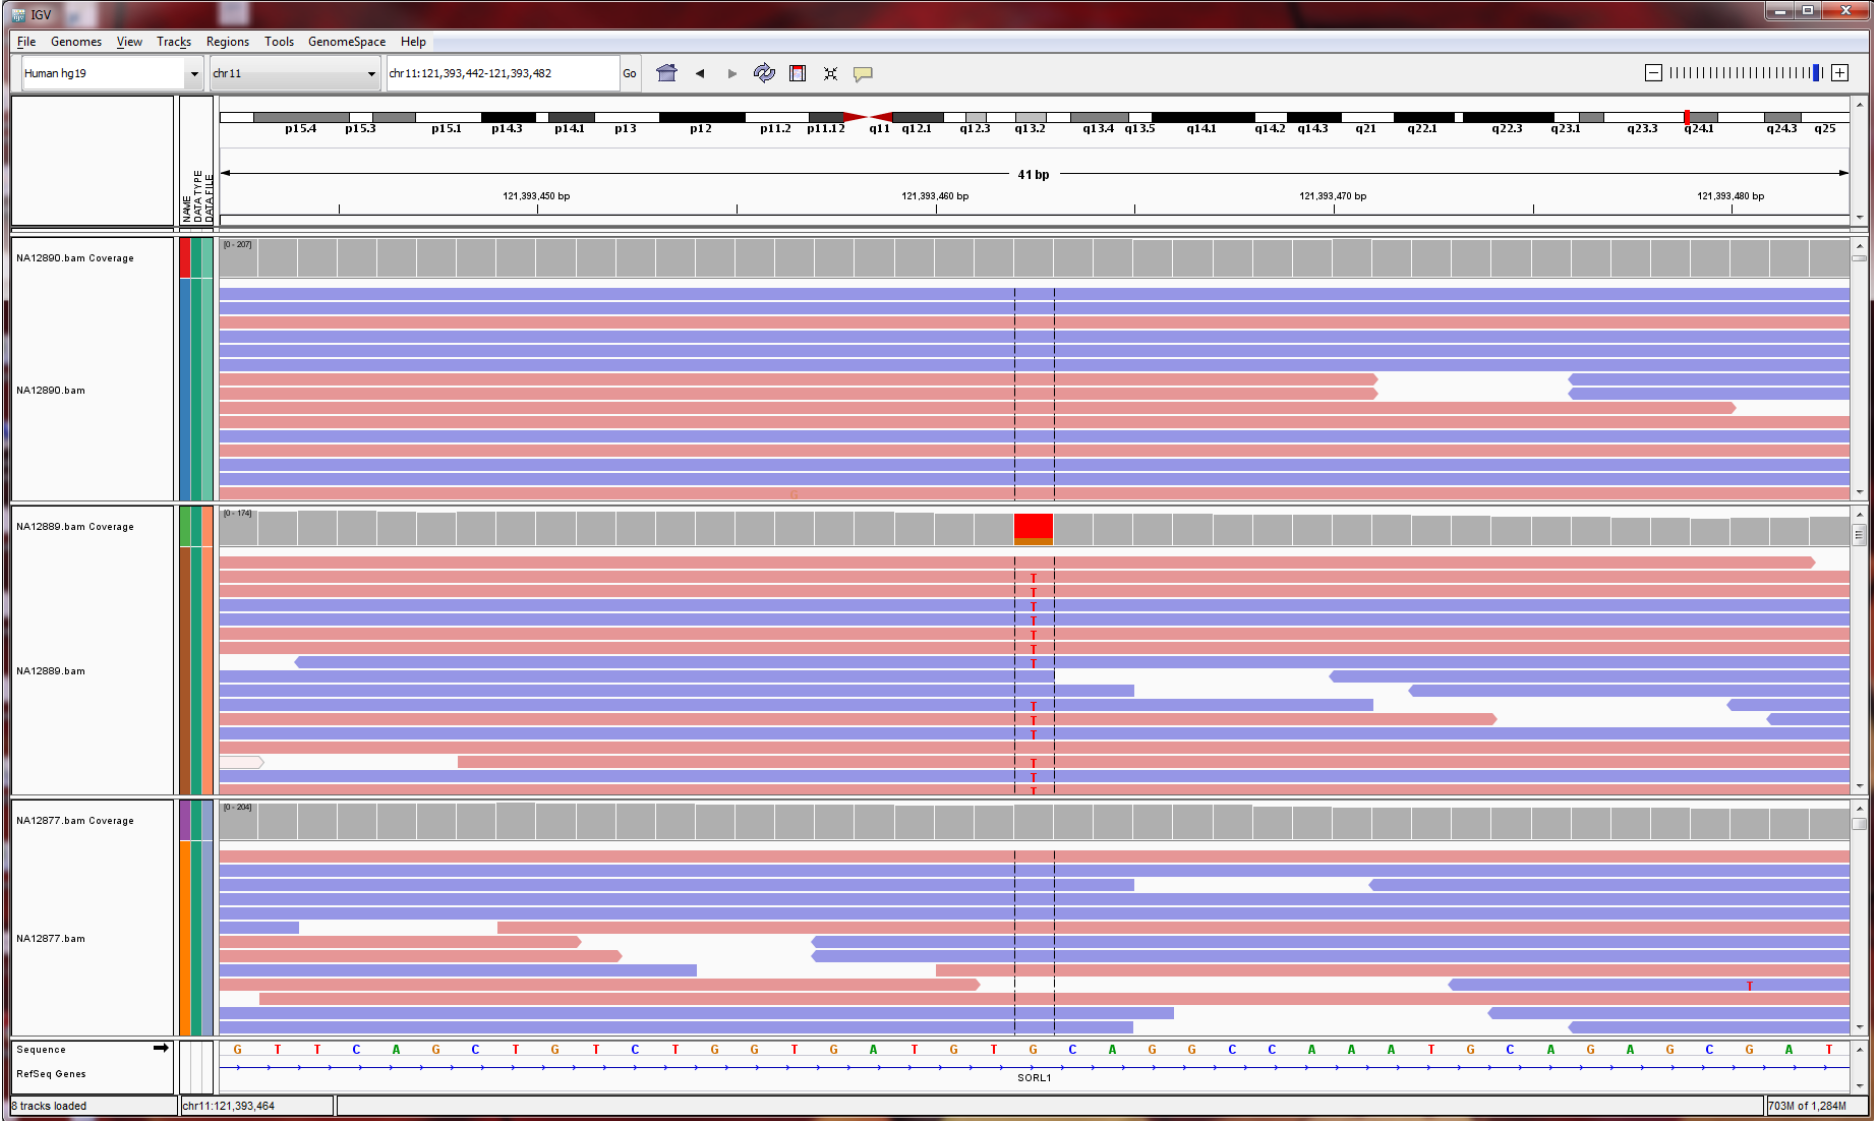

Illumina HOM/HET discordance with chip data 889 (77/33). Add kid and confirm Illumina sequencing genotype as a het for 89.
